# Supplementary material for: High-Pressure Hydrogenation: A Path to Efficient Methane Production from CO2
Source: MDPI journal article supplement (doi:10.3390/methane3010004), 2024-01-15
Supplement: s1 [file s1]

## Supplementary Information

# High-Pressure Hydrogenation: A Path to Efficient Methane Production from CO<sub>2</sub>

Maitê L. Gothe <sup>1</sup>, Adolfo L. Figueredo <sup>1</sup>, Laís R. Borges <sup>1</sup>, Ruben Ramos <sup>2</sup>, Andreia F. Peixoto <sup>3</sup> and Pedro Vidinha <sup>1,\*</sup>

<sup>1</sup> Instituto de Química, Universidade de São Paulo, Av Prof Lineu Prestes 748, 05508-900, Butantã, São Paulo, Brazil; maite.gothe@usp.br (M.L.G.); adolfofigueredo@usp.br (A.L.F.); laisreisborges@usp.br (L.R.B.)

<sup>2</sup> Iberian Centre for Research in Energy Storage (CIIE), 10004 Cáceres, Extremadura, Spain; rrvelarde@hotmail.com

<sup>3</sup> LAQV-REQUIMTE, Departamento de Química e Bioquímica, Faculdade de Ciências, Universidade do Porto, Rua do Campo Alegre s/n, 4169-007 Porto, Portugal; andreia.peixoto@fc.up.pt

\* Correspondence: pvidinha@iq.usp.br

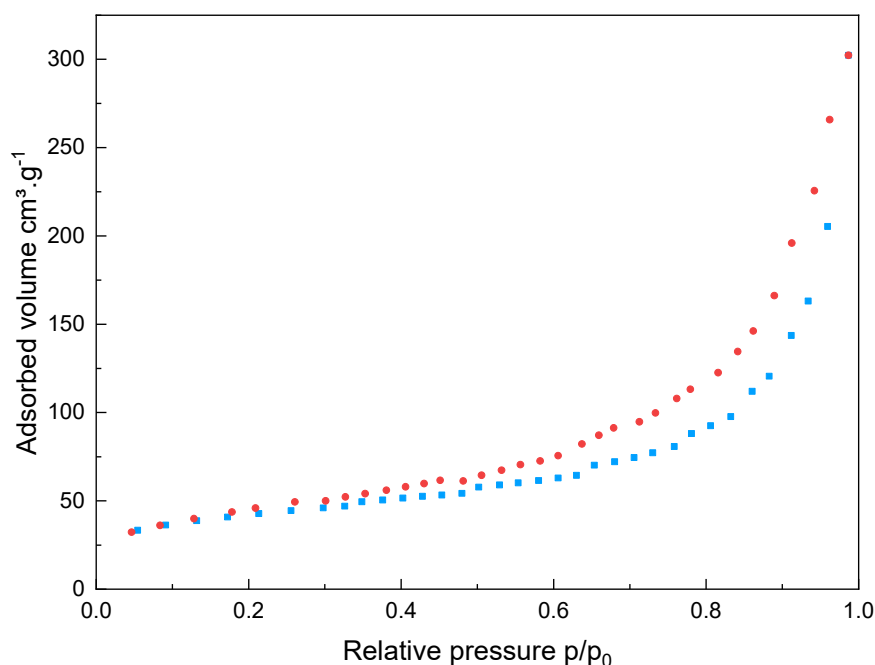

Figure S1. N<sub>2</sub> adsorption and desorption isotherm of as prepared Ni/Al<sub>2</sub>O<sub>3</sub>-HTC.

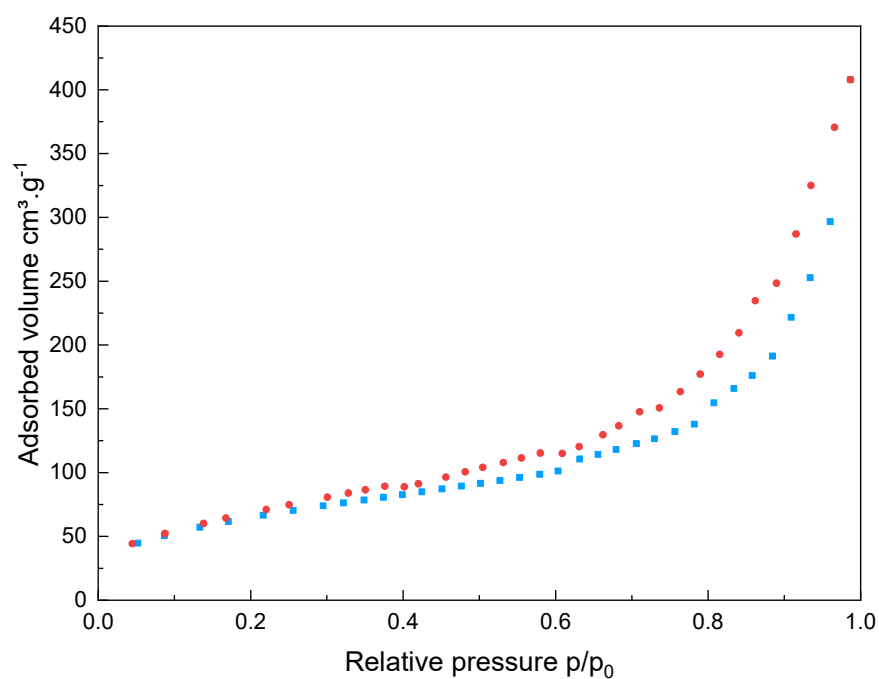

Figure S2. N<sub>2</sub> adsorption and desorption isotherm of Ni/Al<sub>2</sub>O<sub>3</sub>-HTC reduced at 500 °C under H<sub>2</sub>

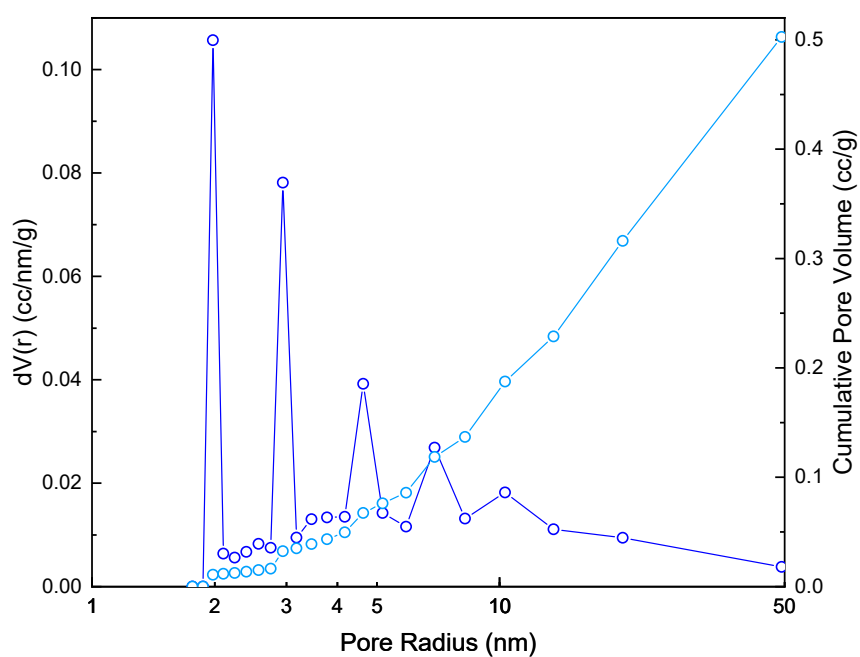

Figure S3. BJH Pore size distribution performed on the adsorption isotherm of as prepared Ni/Al<sub>2</sub>O<sub>3</sub>-HTC

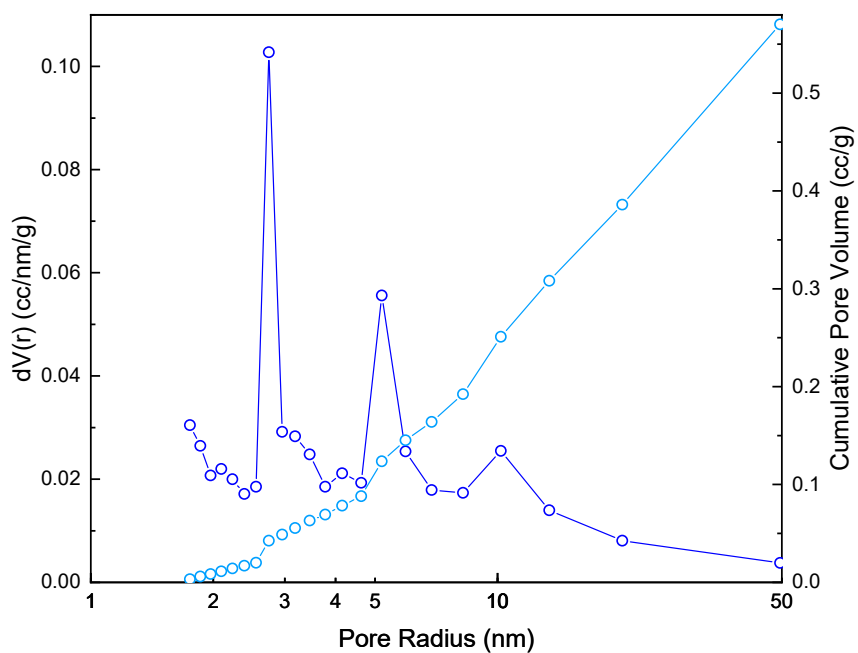

Figure S4. BJH Pore size distribution performed on the adsorption isotherm of Ni/Al<sub>2</sub>O<sub>3</sub>-HTC reduced at 500 °C under H<sub>2</sub>

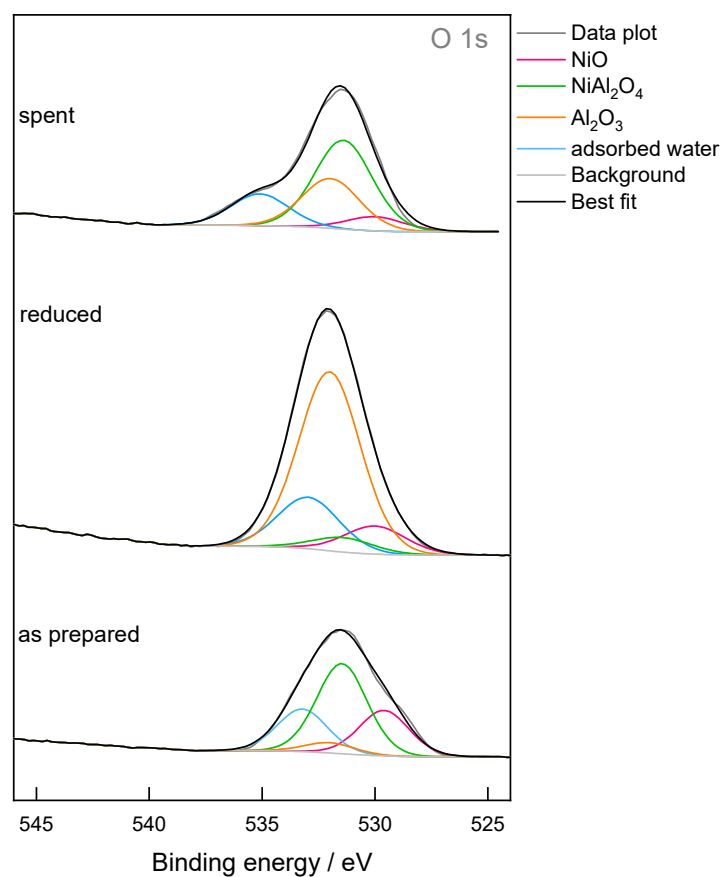

Figure S5. XPS of the O 1s region on Ni/Al<sub>2</sub>O<sub>3</sub>-HTC

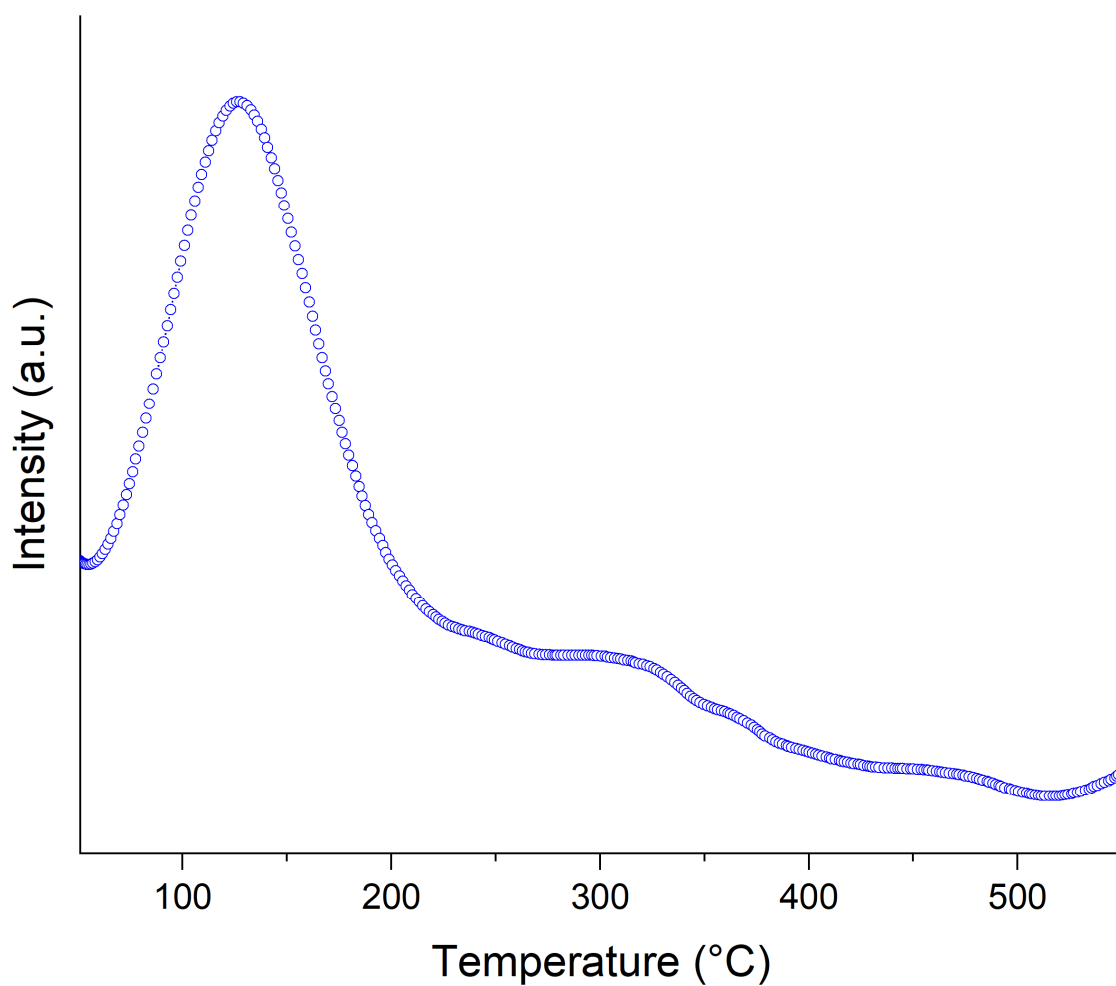

Figure S6. TPD-CO<sub>2</sub> profile of Ni/Al<sub>2</sub>O<sub>3</sub>-HTC pre-reduced at 500 °C under H<sub>2</sub>

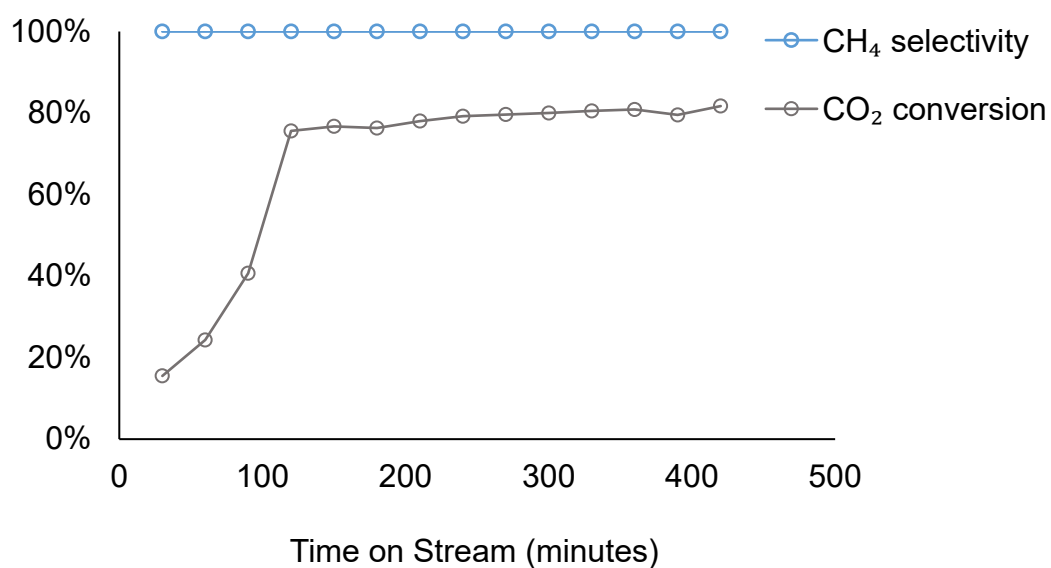

Figure S7. Time on stream plot of the CO<sub>2</sub> methanation reaction over Ni/Al<sub>2</sub>O<sub>3</sub>-HTC. Reaction conditions: 200 mg of catalyst pre-reduced at 500 °C under H<sub>2</sub> for 1 hour, T = 400 °C, p = 40 bar, GHSV = 30,000 mL.g<sub>cat</sub><sup>-1</sup>.h<sup>-1</sup>.
